# Supplementary material for: A first-principles study on Ni-decorated MoS2 for efficient formaldehyde degradation over a wide temperature range
Source: Royal Society of Chemistry journal article supplement (doi:10.1039/d4cp00189c), 2024-01-01
Supplement: d4cp00189c1.pdf [file d4cp00189c1.pdf]

## Supplementary Information

### **A first-principles study on Ni-decorated MoS<sub>2</sub> for efficient formaldehyde degradation over a wide temperature range**

Jiahui Tang, Xiaocha Wang, Honggang Pan,\* Baozeng Zhou\*

*Tianjin Key Laboratory of Film Electronic & Communicate Devices, School of Integrated Circuit  
Science and Engineering, Tianjin University of Technology, Tianjin 300384, China*

\*Corresponding Authors

[phg022@163.com](mailto:phg022@163.com) (H. Pan)

[baozeng@tju.edu.cn](mailto:baozeng@tju.edu.cn) (B. Zhou)

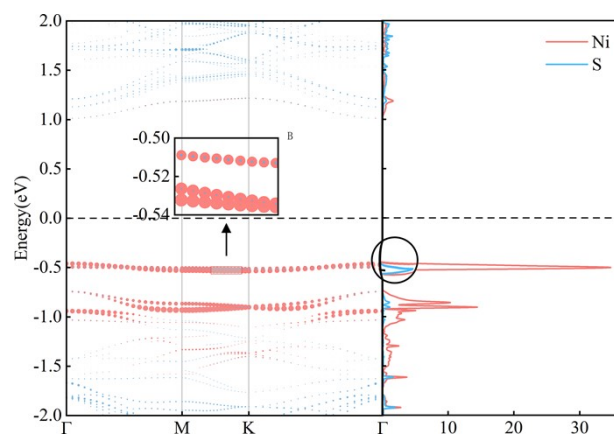

**Fig. S1** Projected band structure and projected DOS of Ni-MoS<sub>2</sub>.

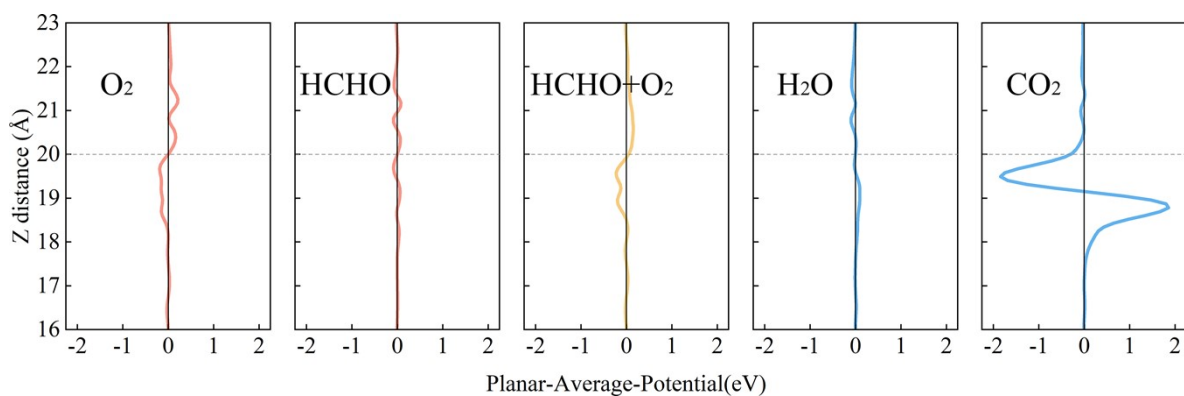

**Fig. S2** Planar-Average-Potential plot illustrating the adsorption behavior of gas molecules on the Ni-MoS<sub>2</sub> surface. The red line represents the reactant species (HCHO and O<sub>2</sub> molecules), while the blue line corresponds to the product species (H<sub>2</sub>O and CO<sub>2</sub> molecules). Additionally, the yellow line depicts the coadsorption of HCHO and O<sub>2</sub> molecules. The dashed gray line indicates the position of the Ni atom.

**Table S1** The logarithms of reaction rate constants for the rate-determining steps in each pathway within the temperature range of 100K to 800K.

| Temperature (K) | L-H (PATH1) | L-H (PATH2) | E-R (PATH1) | E-R (PATH2) |
|-----------------|-------------|-------------|-------------|-------------|
| 100             | 27.99664332 | 28.98648952 | 28.89216    | 29.17047    |
| 200             | 30.63161661 | 31.08865637 | 31.08101    | 31.2131     |
| 300             | 31.86106112 | 32.13268705 | 32.15475    | 32.17468    |
| 400             | 32.64710373 | 32.82307908 | 32.86152    | 32.84793    |
| 500             | 33.22073434 | 33.33781595 | 33.40108    | 33.35264    |
| 600             | 33.67092521 | 33.74777171 | 33.82061    | 33.75604    |
| 700             | 34.04080822 | 34.08819785 | 34.16827    | 34.09185    |
| 800             | 34.35441865 | 34.39110677 | 34.46496    | 34.37938    |

**Table S2** The imaginary frequency values of transition states ( $\text{cm}^{-1}$ ).

|           | TS1   | TS2    | TS3   | TS4    | TS5    | TS6    | TS7    | TS8    | TS9   |
|-----------|-------|--------|-------|--------|--------|--------|--------|--------|-------|
| Frequency | 80.51 | 374.15 | 88.32 | 361.80 | 111.70 | 114.85 | 205.76 | 151.78 | 42.93 |

**Table S3** The coordinates of optimized transition state configurations [(a)~(i): TS1~TS9].

| (a)           |       |       |   |   |   |  | (b)           |       |       |   |   |   |  | (c)           |      |       |   |   |   |  |
|---------------|-------|-------|---|---|---|--|---------------|-------|-------|---|---|---|--|---------------|------|-------|---|---|---|--|
| 10.96         | 0.00  | 0.00  |   |   |   |  | 10.97         | 0.00  | 0.00  |   |   |   |  | 10.97         | 0.00 | 0.00  |   |   |   |  |
| -5.48         | 9.51  | 0.00  |   |   |   |  | -5.48         | 9.51  | 0.00  |   |   |   |  | -5.49         | 9.51 | 0.00  |   |   |   |  |
| -0.01         | -0.01 | 26.55 |   |   |   |  | 0.00          | -0.02 | 26.56 |   |   |   |  | -0.05         | 0.04 | 26.55 |   |   |   |  |
| S             | Mo    | Ni    | O | C | H |  | S             | Mo    | Ni    | O | C | H |  | S             | Mo   | Ni    | O | C | H |  |
| 24            | 12    | 1     | 3 | 1 | 2 |  | 24            | 12    | 1     | 3 | 1 | 2 |  | 24            | 12   | 1     | 3 | 1 | 2 |  |
| <b>Direct</b> |       |       |   |   |   |  | <b>Direct</b> |       |       |   |   |   |  | <b>Direct</b> |      |       |   |   |   |  |
| 0.17          | 0.50  | 0.56  |   |   |   |  | 0.17          | 0.50  | 0.56  |   |   |   |  | 0.18          | 0.50 | 0.56  |   |   |   |  |
| 0.51          | 0.17  | 0.56  |   |   |   |  | 0.51          | 0.17  | 0.56  |   |   |   |  | 0.51          | 0.17 | 0.56  |   |   |   |  |
| 0.84          | 0.84  | 0.56  |   |   |   |  | 0.84          | 0.84  | 0.56  |   |   |   |  | 0.84          | 0.83 | 0.56  |   |   |   |  |
| 0.17          | 0.00  | 0.56  |   |   |   |  | 0.17          | 0.00  | 0.56  |   |   |   |  | 0.17          | 1.00 | 0.56  |   |   |   |  |
| 0.51          | 0.67  | 0.56  |   |   |   |  | 0.51          | 0.67  | 0.56  |   |   |   |  | 0.51          | 0.67 | 0.56  |   |   |   |  |
| 0.84          | 0.33  | 0.56  |   |   |   |  | 0.84          | 0.34  | 0.56  |   |   |   |  | 0.84          | 0.33 | 0.56  |   |   |   |  |
| 0.01          | 0.17  | 0.56  |   |   |   |  | 0.01          | 0.17  | 0.56  |   |   |   |  | 0.01          | 0.17 | 0.56  |   |   |   |  |
| 0.34          | 0.83  | 0.56  |   |   |   |  | 0.34          | 0.83  | 0.56  |   |   |   |  | 0.34          | 0.83 | 0.56  |   |   |   |  |
| 0.67          | 0.50  | 0.56  |   |   |   |  | 0.67          | 0.50  | 0.56  |   |   |   |  | 0.67          | 0.50 | 0.56  |   |   |   |  |
| 0.17          | 0.50  | 0.68  |   |   |   |  | 0.17          | 0.50  | 0.68  |   |   |   |  | 0.17          | 0.50 | 0.68  |   |   |   |  |
| 0.51          | 0.17  | 0.68  |   |   |   |  | 0.51          | 0.17  | 0.68  |   |   |   |  | 0.51          | 0.17 | 0.68  |   |   |   |  |
| 0.84          | 0.84  | 0.68  |   |   |   |  | 0.84          | 0.83  | 0.68  |   |   |   |  | 0.85          | 0.83 | 0.68  |   |   |   |  |
| 0.17          | 0.00  | 0.68  |   |   |   |  | 0.17          | 0.00  | 0.68  |   |   |   |  | 0.17          | 0.00 | 0.68  |   |   |   |  |
| 0.51          | 0.68  | 0.68  |   |   |   |  | 0.50          | 0.66  | 0.68  |   |   |   |  | 0.50          | 0.66 | 0.68  |   |   |   |  |
| 0.84          | 0.33  | 0.68  |   |   |   |  | 0.84          | 0.34  | 0.68  |   |   |   |  | 0.84          | 0.33 | 0.68  |   |   |   |  |
| 0.01          | 0.17  | 0.68  |   |   |   |  | 0.01          | 0.17  | 0.68  |   |   |   |  | 0.01          | 0.17 | 0.68  |   |   |   |  |
| 0.34          | 0.84  | 0.68  |   |   |   |  | 0.34          | 0.84  | 0.68  |   |   |   |  | 0.34          | 0.83 | 0.68  |   |   |   |  |
| 0.68          | 0.50  | 0.68  |   |   |   |  | 0.67          | 0.50  | 0.68  |   |   |   |  | 0.67          | 0.50 | 0.68  |   |   |   |  |
| 0.01          | 0.67  | 0.56  |   |   |   |  | 0.01          | 0.67  | 0.56  |   |   |   |  | 0.01          | 0.67 | 0.56  |   |   |   |  |
| 0.34          | 0.34  | 0.56  |   |   |   |  | 0.34          | 0.34  | 0.56  |   |   |   |  | 0.34          | 0.33 | 0.56  |   |   |   |  |
| 0.67          | 0.00  | 0.56  |   |   |   |  | 0.67          | 1.00  | 0.56  |   |   |   |  | 0.67          | 1.00 | 0.56  |   |   |   |  |
| 0.01          | 0.67  | 0.68  |   |   |   |  | 0.01          | 0.67  | 0.68  |   |   |   |  | 0.01          | 0.67 | 0.68  |   |   |   |  |
| 0.33          | 0.33  | 0.68  |   |   |   |  | 0.34          | 0.33  | 0.68  |   |   |   |  | 0.34          | 0.33 | 0.68  |   |   |   |  |
| 0.67          | 0.00  | 0.68  |   |   |   |  | 0.67          | 0.01  | 0.68  |   |   |   |  | 0.68          | 0.01 | 0.68  |   |   |   |  |
| 0.34          | 0.17  | 0.62  |   |   |   |  | 0.34          | 0.17  | 0.62  |   |   |   |  | 0.34          | 0.17 | 0.62  |   |   |   |  |
| 0.67          | 0.84  | 0.62  |   |   |   |  | 0.67          | 0.84  | 0.62  |   |   |   |  | 0.67          | 0.83 | 0.62  |   |   |   |  |
| 0.01          | 0.50  | 0.62  |   |   |   |  | 0.01          | 0.50  | 0.62  |   |   |   |  | 0.01          | 0.50 | 0.62  |   |   |   |  |
| 0.17          | 0.83  | 0.62  |   |   |   |  | 0.17          | 0.84  | 0.62  |   |   |   |  | 0.17          | 0.83 | 0.62  |   |   |   |  |
| 0.51          | 0.50  | 0.62  |   |   |   |  | 0.51          | 0.50  | 0.62  |   |   |   |  | 0.51          | 0.50 | 0.62  |   |   |   |  |
| 0.84          | 0.17  | 0.62  |   |   |   |  | 0.84          | 0.17  | 0.62  |   |   |   |  | 0.84          | 0.17 | 0.62  |   |   |   |  |
| 0.17          | 0.34  | 0.62  |   |   |   |  | 0.17          | 0.34  | 0.62  |   |   |   |  | 0.17          | 0.33 | 0.62  |   |   |   |  |
| 0.51          | 0.00  | 0.62  |   |   |   |  | 0.51          | 0.00  | 0.62  |   |   |   |  | 0.51          | 1.00 | 0.62  |   |   |   |  |
| 0.84          | 0.67  | 0.62  |   |   |   |  | 0.84          | 0.67  | 0.62  |   |   |   |  | 0.84          | 0.67 | 0.62  |   |   |   |  |
| 0.01          | 0.00  | 0.62  |   |   |   |  | 0.01          | 0.00  | 0.62  |   |   |   |  | 0.01          | 0.00 | 0.62  |   |   |   |  |
| 0.34          | 0.67  | 0.62  |   |   |   |  | 0.34          | 0.67  | 0.62  |   |   |   |  | 0.34          | 0.67 | 0.62  |   |   |   |  |
| 0.67          | 0.33  | 0.62  |   |   |   |  | 0.67          | 0.33  | 0.62  |   |   |   |  | 0.67          | 0.33 | 0.62  |   |   |   |  |

|      |      |      |
|------|------|------|
| 0.50 | 0.50 | 0.72 |
| 0.37 | 0.50 | 0.78 |
| 0.33 | 0.41 | 0.81 |
| 0.62 | 0.52 | 0.79 |
| 0.59 | 0.44 | 0.82 |
| 0.64 | 0.47 | 0.86 |
| 0.50 | 0.33 | 0.82 |

|      |      |      |
|------|------|------|
| 0.50 | 0.50 | 0.73 |
| 0.40 | 0.51 | 0.78 |
| 0.47 | 0.54 | 0.83 |
| 0.64 | 0.43 | 0.79 |
| 0.62 | 0.43 | 0.83 |
| 0.69 | 0.44 | 0.86 |
| 0.44 | 0.44 | 0.84 |

|      |      |      |
|------|------|------|
| 0.52 | 0.50 | 0.73 |
| 0.38 | 0.48 | 0.78 |
| 0.36 | 0.39 | 0.82 |
| 0.66 | 0.55 | 0.79 |
| 0.64 | 0.49 | 0.82 |
| 0.53 | 0.40 | 0.83 |
| 0.36 | 0.44 | 0.84 |

(d)

|        |      |       |   |   |   |
|--------|------|-------|---|---|---|
| 10.96  | 0.00 | 0.00  |   |   |   |
| -5.49  | 9.51 | 0.00  |   |   |   |
| -0.08  | 0.20 | 26.31 |   |   |   |
| S      | Mo   | Ni    | O | C | H |
| 24     | 12   | 1     | 3 | 1 | 2 |
| Direct |      |       |   |   |   |
| 0.17   | 0.50 | 0.56  |   |   |   |
| 0.51   | 0.17 | 0.56  |   |   |   |
| 0.84   | 0.84 | 0.56  |   |   |   |
| 0.17   | 0.00 | 0.56  |   |   |   |
| 0.51   | 0.67 | 0.56  |   |   |   |
| 0.84   | 0.34 | 0.56  |   |   |   |
| 0.01   | 0.17 | 0.56  |   |   |   |
| 0.34   | 0.84 | 0.56  |   |   |   |
| 0.67   | 0.50 | 0.56  |   |   |   |
| 0.17   | 0.50 | 0.68  |   |   |   |
| 0.50   | 0.16 | 0.68  |   |   |   |
| 0.84   | 0.83 | 0.68  |   |   |   |
| 0.17   | 1.00 | 0.68  |   |   |   |
| 0.51   | 0.67 | 0.68  |   |   |   |
| 0.84   | 0.33 | 0.68  |   |   |   |
| 0.01   | 0.17 | 0.68  |   |   |   |
| 0.34   | 0.83 | 0.68  |   |   |   |
| 0.68   | 0.50 | 0.68  |   |   |   |
| 0.00   | 0.67 | 0.56  |   |   |   |
| 0.34   | 0.34 | 0.56  |   |   |   |
| 0.67   | 0.00 | 0.56  |   |   |   |
| 0.01   | 0.67 | 0.68  |   |   |   |
| 0.33   | 0.33 | 0.68  |   |   |   |
| 0.67   | 0.00 | 0.68  |   |   |   |
| 0.34   | 0.17 | 0.62  |   |   |   |
| 0.67   | 0.84 | 0.62  |   |   |   |
| 0.01   | 0.50 | 0.62  |   |   |   |
| 0.17   | 0.83 | 0.62  |   |   |   |
| 0.51   | 0.50 | 0.62  |   |   |   |
| 0.84   | 0.17 | 0.62  |   |   |   |

(e)

|        |       |       |   |   |   |
|--------|-------|-------|---|---|---|
| 10.96  | 0.01  | 0.00  |   |   |   |
| -5.49  | 9.50  | 0.00  |   |   |   |
| 0.03   | -0.03 | 26.53 |   |   |   |
| S      | Mo    | Ni    | O | C | H |
| 24     | 12    | 1     | 3 | 1 | 2 |
| Direct |       |       |   |   |   |
| 0.17   | 0.50  | 0.56  |   |   |   |
| 0.51   | 0.17  | 0.56  |   |   |   |
| 0.84   | 0.84  | 0.56  |   |   |   |
| 0.17   | 0.00  | 0.56  |   |   |   |
| 0.51   | 0.67  | 0.56  |   |   |   |
| 0.84   | 0.34  | 0.56  |   |   |   |
| 0.01   | 0.17  | 0.56  |   |   |   |
| 0.34   | 0.84  | 0.56  |   |   |   |
| 0.67   | 0.50  | 0.56  |   |   |   |
| 0.17   | 0.50  | 0.68  |   |   |   |
| 0.50   | 0.17  | 0.68  |   |   |   |
| 0.84   | 0.84  | 0.68  |   |   |   |
| 0.17   | 0.00  | 0.68  |   |   |   |
| 0.51   | 0.68  | 0.68  |   |   |   |
| 0.84   | 0.34  | 0.68  |   |   |   |
| 0.00   | 0.17  | 0.68  |   |   |   |
| 0.34   | 0.84  | 0.68  |   |   |   |
| 0.68   | 0.50  | 0.68  |   |   |   |
| 0.00   | 0.67  | 0.56  |   |   |   |
| 0.34   | 0.34  | 0.56  |   |   |   |
| 0.67   | 0.00  | 0.56  |   |   |   |
| 0.01   | 0.67  | 0.68  |   |   |   |
| 0.33   | 0.33  | 0.68  |   |   |   |
| 0.67   | 0.00  | 0.68  |   |   |   |
| 0.34   | 0.17  | 0.62  |   |   |   |
| 0.67   | 0.84  | 0.62  |   |   |   |
| 0.00   | 0.50  | 0.62  |   |   |   |
| 0.17   | 0.84  | 0.62  |   |   |   |
| 0.51   | 0.50  | 0.62  |   |   |   |
| 0.84   | 0.17  | 0.62  |   |   |   |

(f)

|        |       |       |   |   |   |
|--------|-------|-------|---|---|---|
| 10.95  | 0.00  | 0.00  |   |   |   |
| -5.48  | 9.52  | 0.00  |   |   |   |
| 0.03   | -0.01 | 26.59 |   |   |   |
| S      | Mo    | Ni    | O | C | H |
| 24     | 12    | 1     | 3 | 1 | 2 |
| Direct |       |       |   |   |   |
| 0.17   | 0.50  | 0.56  |   |   |   |
| 0.50   | 0.17  | 0.56  |   |   |   |
| 0.84   | 0.84  | 0.56  |   |   |   |
| 0.17   | 0.00  | 0.56  |   |   |   |
| 0.50   | 0.67  | 0.56  |   |   |   |
| 0.84   | 0.34  | 0.56  |   |   |   |
| 0.00   | 0.17  | 0.56  |   |   |   |
| 0.34   | 0.84  | 0.56  |   |   |   |
| 0.67   | 0.50  | 0.56  |   |   |   |
| 0.17   | 0.50  | 0.68  |   |   |   |
| 0.50   | 0.17  | 0.68  |   |   |   |
| 0.84   | 0.84  | 0.68  |   |   |   |
| 0.17   | 0.00  | 0.68  |   |   |   |
| 0.50   | 0.67  | 0.68  |   |   |   |
| 0.84   | 0.33  | 0.68  |   |   |   |
| 0.00   | 0.17  | 0.68  |   |   |   |
| 0.34   | 0.84  | 0.68  |   |   |   |
| 0.67   | 0.50  | 0.68  |   |   |   |
| 0.00   | 0.67  | 0.56  |   |   |   |
| 0.34   | 0.34  | 0.56  |   |   |   |
| 0.67   | 0.00  | 0.56  |   |   |   |
| 0.00   | 0.67  | 0.68  |   |   |   |
| 0.33   | 0.33  | 0.68  |   |   |   |
| 0.67   | 0.00  | 0.68  |   |   |   |
| 0.34   | 0.17  | 0.62  |   |   |   |
| 0.67   | 0.84  | 0.62  |   |   |   |
| 0.00   | 0.50  | 0.62  |   |   |   |
| 0.17   | 0.84  | 0.62  |   |   |   |
| 0.50   | 0.50  | 0.62  |   |   |   |
| 0.84   | 0.17  | 0.62  |   |   |   |

|      |      |      |
|------|------|------|
| 0.17 | 0.33 | 0.62 |
| 0.51 | 0.00 | 0.62 |
| 0.84 | 0.67 | 0.62 |
| 0.01 | 0.00 | 0.62 |
| 0.34 | 0.67 | 0.62 |
| 0.67 | 0.33 | 0.62 |
| 0.51 | 0.50 | 0.72 |
| 0.38 | 0.50 | 0.77 |
| 0.38 | 0.45 | 0.82 |
| 0.64 | 0.58 | 0.79 |
| 0.61 | 0.52 | 0.83 |
| 0.56 | 0.41 | 0.84 |
| 0.37 | 0.52 | 0.84 |

|      |      |      |
|------|------|------|
| 0.17 | 0.34 | 0.62 |
| 0.51 | 0.00 | 0.62 |
| 0.84 | 0.67 | 0.62 |
| 0.01 | 0.00 | 0.62 |
| 0.34 | 0.67 | 0.62 |
| 0.67 | 0.34 | 0.62 |
| 0.51 | 0.51 | 0.72 |
| 0.47 | 0.56 | 0.78 |
| 0.43 | 0.47 | 0.83 |
| 0.61 | 0.28 | 0.80 |
| 0.63 | 0.40 | 0.80 |
| 0.73 | 0.50 | 0.80 |
| 0.48 | 0.42 | 0.82 |

|      |      |      |
|------|------|------|
| 0.17 | 0.34 | 0.62 |
| 0.50 | 0.00 | 0.62 |
| 0.84 | 0.67 | 0.62 |
| 0.00 | 0.00 | 0.62 |
| 0.33 | 0.67 | 0.62 |
| 0.67 | 0.33 | 0.62 |
| 0.50 | 0.50 | 0.72 |
| 0.50 | 0.49 | 0.79 |
| 0.33 | 0.41 | 0.83 |
| 0.71 | 0.52 | 0.81 |
| 0.60 | 0.50 | 0.82 |
| 0.56 | 0.48 | 0.86 |
| 0.31 | 0.48 | 0.82 |

(g)

|        |       |       |   |   |   |
|--------|-------|-------|---|---|---|
| 10.97  | 0.00  | 0.00  |   |   |   |
| -5.48  | 9.51  | 0.00  |   |   |   |
| 0.00   | -0.02 | 26.56 |   |   |   |
| S      | Mo    | Ni    | O | C | H |
| 24     | 12    | 1     | 3 | 1 | 2 |
| Direct |       |       |   |   |   |
| 0.18   | 0.50  | 0.56  |   |   |   |
| 0.51   | 0.17  | 0.56  |   |   |   |
| 0.84   | 0.84  | 0.56  |   |   |   |
| 0.17   | 0.00  | 0.56  |   |   |   |
| 0.51   | 0.67  | 0.56  |   |   |   |
| 0.84   | 0.34  | 0.56  |   |   |   |
| 0.01   | 0.17  | 0.56  |   |   |   |
| 0.34   | 0.83  | 0.56  |   |   |   |
| 0.67   | 0.50  | 0.56  |   |   |   |
| 0.17   | 0.50  | 0.68  |   |   |   |
| 0.51   | 0.17  | 0.68  |   |   |   |
| 0.84   | 0.84  | 0.68  |   |   |   |
| 0.17   | 0.00  | 0.68  |   |   |   |
| 0.51   | 0.67  | 0.68  |   |   |   |
| 0.84   | 0.34  | 0.68  |   |   |   |
| 0.01   | 0.17  | 0.68  |   |   |   |
| 0.34   | 0.84  | 0.68  |   |   |   |
| 0.68   | 0.50  | 0.68  |   |   |   |
| 0.01   | 0.67  | 0.56  |   |   |   |
| 0.34   | 0.34  | 0.56  |   |   |   |
| 0.67   | 0.00  | 0.56  |   |   |   |
| 0.01   | 0.67  | 0.68  |   |   |   |
| 0.33   | 0.33  | 0.68  |   |   |   |

(h)

|        |       |       |   |   |   |
|--------|-------|-------|---|---|---|
| 10.95  | 0.00  | 0.00  |   |   |   |
| -5.49  | 9.50  | 0.00  |   |   |   |
| 0.01   | -0.01 | 26.57 |   |   |   |
| S      | Mo    | Ni    | O | C | H |
| 24     | 12    | 1     | 3 | 1 | 2 |
| Direct |       |       |   |   |   |
| 0.17   | 0.50  | 0.56  |   |   |   |
| 0.51   | 0.17  | 0.56  |   |   |   |
| 0.84   | 0.84  | 0.56  |   |   |   |
| 0.17   | 0.00  | 0.56  |   |   |   |
| 0.51   | 0.67  | 0.56  |   |   |   |
| 0.84   | 0.33  | 0.56  |   |   |   |
| 0.01   | 0.17  | 0.56  |   |   |   |
| 0.34   | 0.83  | 0.56  |   |   |   |
| 0.67   | 0.50  | 0.56  |   |   |   |
| 0.17   | 0.50  | 0.68  |   |   |   |
| 0.51   | 0.17  | 0.68  |   |   |   |
| 0.84   | 0.84  | 0.68  |   |   |   |
| 0.17   | 0.00  | 0.68  |   |   |   |
| 0.51   | 0.67  | 0.68  |   |   |   |
| 0.84   | 0.33  | 0.68  |   |   |   |
| 0.01   | 0.17  | 0.68  |   |   |   |
| 0.34   | 0.84  | 0.68  |   |   |   |
| 0.67   | 0.50  | 0.68  |   |   |   |
| 0.00   | 0.67  | 0.56  |   |   |   |
| 0.34   | 0.34  | 0.56  |   |   |   |
| 0.67   | 0.00  | 0.56  |   |   |   |
| 0.01   | 0.67  | 0.68  |   |   |   |
| 0.34   | 0.33  | 0.68  |   |   |   |

(i)

|        |      |       |   |   |   |
|--------|------|-------|---|---|---|
| 10.97  | 0.00 | 0.00  |   |   |   |
| -5.45  | 9.52 | 0.00  |   |   |   |
| 0.00   | 0.06 | 26.64 |   |   |   |
| S      | Mo   | Ni    | O | C | H |
| 24     | 12   | 1     | 3 | 1 | 2 |
| Direct |      |       |   |   |   |
| 0.17   | 0.50 | 0.56  |   |   |   |
| 0.51   | 0.17 | 0.56  |   |   |   |
| 0.84   | 0.84 | 0.56  |   |   |   |
| 0.17   | 0.00 | 0.56  |   |   |   |
| 0.51   | 0.67 | 0.56  |   |   |   |
| 0.84   | 0.34 | 0.56  |   |   |   |
| 0.01   | 0.17 | 0.56  |   |   |   |
| 0.34   | 0.83 | 0.56  |   |   |   |
| 0.67   | 0.50 | 0.56  |   |   |   |
| 0.17   | 0.50 | 0.68  |   |   |   |
| 0.51   | 0.17 | 0.68  |   |   |   |
| 0.84   | 0.84 | 0.68  |   |   |   |
| 0.17   | 0.00 | 0.68  |   |   |   |
| 0.50   | 0.67 | 0.68  |   |   |   |
| 0.84   | 0.34 | 0.68  |   |   |   |
| 0.01   | 0.17 | 0.68  |   |   |   |
| 0.34   | 0.84 | 0.68  |   |   |   |
| 0.67   | 0.50 | 0.68  |   |   |   |
| 0.01   | 0.67 | 0.56  |   |   |   |
| 0.34   | 0.34 | 0.56  |   |   |   |
| 0.67   | 0.00 | 0.56  |   |   |   |
| 0.01   | 0.67 | 0.68  |   |   |   |
| 0.34   | 0.33 | 0.68  |   |   |   |

|      |      |      |
|------|------|------|
| 0.68 | 0.00 | 0.68 |
| 0.34 | 0.17 | 0.62 |
| 0.68 | 0.84 | 0.62 |
| 0.01 | 0.50 | 0.62 |
| 0.17 | 0.84 | 0.62 |
| 0.51 | 0.50 | 0.62 |
| 0.84 | 0.17 | 0.62 |
| 0.17 | 0.34 | 0.62 |
| 0.51 | 0.00 | 0.62 |
| 0.84 | 0.67 | 0.62 |
| 0.01 | 0.00 | 0.62 |
| 0.34 | 0.67 | 0.62 |
| 0.67 | 0.33 | 0.62 |
| 0.50 | 0.50 | 0.73 |
| 0.40 | 0.50 | 0.78 |
| 0.47 | 0.56 | 0.82 |
| 0.60 | 0.41 | 0.78 |
| 0.61 | 0.43 | 0.83 |
| 0.68 | 0.41 | 0.85 |
| 0.43 | 0.48 | 0.85 |

|      |      |      |
|------|------|------|
| 0.67 | 0.00 | 0.68 |
| 0.34 | 0.17 | 0.62 |
| 0.67 | 0.84 | 0.62 |
| 0.01 | 0.50 | 0.62 |
| 0.17 | 0.83 | 0.62 |
| 0.51 | 0.50 | 0.62 |
| 0.84 | 0.17 | 0.62 |
| 0.17 | 0.34 | 0.62 |
| 0.51 | 0.00 | 0.62 |
| 0.84 | 0.67 | 0.62 |
| 0.01 | 0.00 | 0.62 |
| 0.34 | 0.67 | 0.62 |
| 0.67 | 0.33 | 0.62 |
| 0.50 | 0.48 | 0.73 |
| 0.36 | 0.46 | 0.77 |
| 0.59 | 0.56 | 0.87 |
| 0.64 | 0.56 | 0.78 |
| 0.61 | 0.51 | 0.83 |
| 0.63 | 0.42 | 0.83 |
| 0.41 | 0.51 | 0.80 |

|      |      |      |
|------|------|------|
| 0.67 | 0.01 | 0.68 |
| 0.34 | 0.17 | 0.62 |
| 0.67 | 0.84 | 0.62 |
| 0.01 | 0.50 | 0.62 |
| 0.17 | 0.84 | 0.62 |
| 0.51 | 0.50 | 0.62 |
| 0.84 | 0.17 | 0.62 |
| 0.17 | 0.34 | 0.62 |
| 0.51 | 0.00 | 0.62 |
| 0.84 | 0.67 | 0.62 |
| 0.01 | 0.00 | 0.62 |
| 0.34 | 0.67 | 0.62 |
| 0.67 | 0.33 | 0.62 |
| 0.51 | 0.50 | 0.72 |
| 0.48 | 0.49 | 0.79 |
| 0.75 | 0.56 | 0.85 |
| 0.79 | 0.76 | 0.81 |
| 0.77 | 0.66 | 0.83 |
| 0.44 | 0.40 | 0.81 |
| 0.41 | 0.52 | 0.80 |
